1 **Low-disturbance farming regenerates healthy critical zone**  
2 **towards sustainable agriculture**

3 Fangbo Deng<sup>\*†‡</sup>, Hongjun Wang<sup>§‡</sup>, Hongtu Xie<sup>\*‡</sup>, Xuelian Bao<sup>\*</sup>, Hongbo He<sup>\*</sup>,

4 Xudong Zhang<sup>\*</sup>, Chao Liang<sup>\*¶</sup>

5 <sup>\*</sup>Key Laboratory of Forest Ecology and Management, Institute of Applied Ecology, Chinese  
6 Academy of Sciences, Shenyang 110016, China

7 <sup>†</sup>University of Chinese Academy of Sciences, Beijing 100049, China

8 <sup>§</sup>Duke University Wetland Center, Nicholas School of the Environment, Duke University,  
9 Durham, NC 27708, USA

10 <sup>‡</sup>These authors contributed equally to this work.

11 <sup>¶</sup>Corresponding author: Chao Liang

12 **Email:** fangbodeng@gmail.com (FD), hw93@duke.edu (HW), xieht@iae.ac.cn (HX),  
13 baoxl@iae.ac.cn (XB), hehongbo@iae.ac.cn (HH), xdzhang@iae.ac.cn (XZ),  
14 cliang823@gmail.com (CL).

15 **Classification**

16 Biological Sciences: Agricultural Sciences;

17 Physical Sciences: Environmental Sciences.

18 **Keywords:** Sustainable agriculture, no-tillage, stover mulching, microbial diversity and  
19 function, deep soil.

20 **Author Contributions**

- 21 H.X. and C.L. designed the experiment, F.D. did field and lab measurements, F.D., H.W. and
- 22 C.L analyzed data and wrote the manuscript, and all the authors discussed results and
- 23 commented on the manuscript.

## 24 **Abstract**

25 Intensive conventional farming has degraded soil quality in farmlands and other  
26 ecosystems globally. Although low-disturbance practices have been widely adapted to  
27 restore soil health and save energy, the underlying mechanisms associated with farm  
28 sustainability are still unclear. Here, we compared soil microbiome, physiochemical  
29 parameters along 3-m deep soil profiles, and crop yield in Northeast China subjected  
30 to ten years of farming practices at 3 levels of disturbance, including conventional  
31 tillage (CT), no-tillage without stover mulching (NTNS), and no-tillage with stover  
32 mulching (NTSM). We found that low-disturbance practices (NTNS and NTSM)  
33 promoted the ability of the soil to retain water and nitrogen, regenerated whole-soil  
34 microbial diversity and function, and significantly improved corn yield at the drought  
35 year. This study implies that the NTSM practice could cut fertilizer-N input by 281.6  
36 kg/ha to corn farmland in, at least, Northeast China and may potentially reduce  
37 China's total greenhouse gas emissions by 1.6% and save about 6.7% households  
38 energy while without reducing corn production.

## 39 **Significance Statement**

40 Intensive conventional farming with high-energy input that has vitally degraded  
41 soils in farmlands. Low-disturbance practices (no-tillage and straw return) as  
42 sustainable ways have been broadly applied, however, little has been done to evaluate  
43 the impact on the soils beyond 1-m depth, a major part of Critical Zone in  
44 agro-ecosystem. Our results show that low disturbance practices not only promoted  
45 soil nutrient and water holding capacities, restored microbial diversity, richness, and  
46 ecological function in the whole 3-m soil profile, but also improved crop production  
47 and potentially reduced energy consumption and cut greenhouse gas emissions, thus  
48 contributing to sustainable farming.

## 49 **Introduction**

50        Since the Industrial Revolution, the rate of soil carbon loss has increased  
51 dramatically, resulting in a global carbon debt due to agriculture of 116 Pg carbon for  
52 the top 2 m of soil(1). The loss of carbon in farmlands has not only changed global  
53 climate but also produced catastrophic cascade impacts on global food security, as soil  
54 carbon is the cornerstone for healthy and productive soil that will be needed to feed  
55 10 billion people in 2050 (United Nations, World Population Prospects 2019). It is  
56 well known that intensive conventional farms with high energy inputs and disturbance  
57 (e.g. chemical fertilizers, tillage/compaction, burn/remove stover) have caused soil  
58 carbon loss with a series of environmental issues(2). Even worse, increasing the  
59 amount of chemical fertilizer is unlikely to continue the increase in quantity and  
60 quality of food products worldwide(3). Moreover, tillage particularly prevents root  
61 growth into deeper soil(4), thus affecting mineral weathering in deep soil(5) and  
62 reducing crop resilience to drought.

63        Since the 1970s, low-disturbance conservative practices (e.g. reduced tillage,  
64 no-tillage and stover mulching) have been gradually applied to restore soil health and  
65 reduce non-point source pollution(6). Growing evidence shows that no-tillage and  
66 stover mulching boosted top-soil organic carbon (SOC)(7-9), increased soil  
67 aggregate(10) and reduced soil erosion and surface runoff(11). All these benefits from  
68 low-disturbance practices are tied with complex microbial processes that interact with  
69 crops and drive soil carbon transformation and stabilization(12, 13). However, most  
70 studies only focused on topsoil or soils within 1-m depth(14-16). Soil below 1 meter,  
71 which belongs to Earth's Critical zone, was often overlooked despite that some crops  
72 have roots over 1 meter deep and microbes in the deep soils (> 1 m) may substantially  
73 impact long-term carbon sequestration, mineral weathering and crop

74 production(17-19). Furthermore, deep roots influence material cycles in surficial soil  
75 and microbes inhabiting in the deep soils, which plays important roles in bridging  
76 aboveground vegetation with parent soils and even acts as an essential buffer  
77 protecting underground water(20). To completely evaluate the impact of  
78 low-disturbance practices on agro-ecosystem, an urgent need is to test the changes  
79 and functions of microbial communities in deep soil(21). Since microbial activities in  
80 deep soil are generally limited by the availability of labile carbon, we hypothesized  
81 that low-disturbance practices are conducive to deeper root growth, which could  
82 provide labile carbon and nutrients(4) and accelerate mineral weathering(5), thus  
83 substantially influencing the microbial composition in the deep soils and in turn the  
84 sustainability of whole ecosystem.

85       Recent research shows that corn belts in the U.S.A., western Europe, and China  
86 have experienced the most soil carbon loss globally(1). The corn belt in Northeast  
87 China is considered as the “breadbasket” of the country, having the largest grain  
88 production and overlapping with the most fertile Mollisol region that sustains 3% of  
89 population in the world(22), accounting for over 30% of corn production of China(23).  
90 Here, a 10-year manipulative experiment was conducted at a temperate corn farm in  
91 Northeast China, investigating farming practices with three levels of disturbance:  
92 high-disturbance—conventional tillage (CT), low disturbance—no-tillage without  
93 stover mulching (NTNS) and no-tillage with 100% stover mulching (NTSM). We  
94 compared corn yield, soil properties and microbial communities of the 3-m soil  
95 profiles at the end of 10 years. We aimed at testing our main hypothesis that the  
96 lowest disturbance practice—no-tillage with 100% stover mulching, similar to  
97 undisturbed natural ecosystem, would regenerate microbial diversity and function  
98 toward a high-resilient natural ecosystem.

99 **Results**

100 **Soil properties and corn yield.** Soil properties varied significantly among  
101 disturbance practices and at different soil depths (SI Appendix, Table S1). The SOC,  
102 TN and C/N ratio substantially decreased from the soil surface to around 150 cm  
103 depths and then remained unchanged within 150-300 cm (Fig. 1). The NTSM slightly  
104 increased SOC, TN and C/N ratio at 0-20 cm soil layers compared with the NTNS and  
105 the CT (Fig. 1 and SI Appendix, Table S1). The no-tillage practices of NTSM and  
106 NTNS reduced soil pH in surface and deeper layers (Fig. 1d) and increased soil  
107 moisture at surface layers (0-60 cm) (Fig. 1e). In the CT plots, soil  $\text{NO}_3^-$ -N  
108 concentration first decreased and then increased remarkably, ranged from 4.19 to  
109  $23.32 \text{ mg kg}^{-1}$  (Fig. 1i). However, under the NTNS and NTSM treatments, soil  
110  $\text{NO}_3^-$ -N decreased significantly at 0-40 cm then increased to the maximum at 120-150  
111 cm depth. Interestingly, above 120-150 cm layer,  $\text{NO}_3^-$ -N was significantly higher  
112 with low-disturbance practices than conventional tillage, while the soil below 150 cm  
113 under low-disturbance practices had much lower  $\text{NO}_3^-$ -N compared to conventional  
114 tillage (Fig. 1i). The NTNS plots contained much higher amounts of ammonium than  
115 the CT and the NTSM plots (Fig. 1h). Soil salt-extractable organic carbon (SEOC), as  
116 an organic acid proxy, is positively associated with root density and can be an  
117 indicator of root depth in deep soil(5). The SEOC declined from the surface to 40-60  
118 cm and then increase to its peak at 60-90 cm under CT, at 90-120 cm under NTNS  
119 and at 120-150 cm under NTSM (Fig. 1b). Hence, we estimate that corn roots reached  
120 up to 60-90 cm, 90-120 cm and 120-150 cm under the CT, the NTNS and the NTSM,  
121 respectively, which is in line with reported corn root depths (~150 cm)(4, 24). The  
122 NTSM increased the SEOC concentration at almost all soil layers compared with the  
123 CT and the NTNS (Fig. 1b), in which at the surface and 120-150 cm depth the

124 contents of SEOC with NTSM were twice higher than CT. The increased SEOC in  
125 deep soils under NTSM reduced soil pH as shown by a significant negative  
126 relationship between SEOC and pH ( $r=0.678$ ,  $p<0.05$ ). The relative contributions of  
127 SEOC to SOC (SEOC/SOC) in the NTSM were also always higher than in the CT and  
128 the NTNS (Fig. 1c). Based on the estimated root depths, total soil inorganic nitrogen  
129 available for the coming growing season in the NTSM and the NTNS was 427.34 and  
130 352.34 kg ha<sup>-1</sup>, respectively, while only 179.63 kg ha<sup>-1</sup> in conventional tillage.

131 The mean annual corn yield (2013-2016) in the NTSM is 13416.8 kg/ha, which is  
132 much higher than the CT and NTNS (Fig. 2), particularly during the drought year of  
133 2015, with only 409.6 mm of rainfall during the growing season (about 100 mm lower  
134 than the mean rainfall), while the corn yield in NTSM is 36.4% and 22.3% higher  
135 than the CT and NTNS, respectively (Fig. 2).

136 **Microbial diversity, composition, and structure.** The microbial richness (Chao1),  
137 observed number of species (Observed-species) and diversity (Shannon-Index) first  
138 increased within 0-20 cm and decreased from 20 to 90 cm, then increased hereafter  
139 (Fig. 3). The low-disturbance practices significantly increased Chao1,  
140 Observed-species and Shannon-Index, particularly in 0-40 cm soil depths (Fig. 3).  
141 There were 54 microbial phyla across all soil samples. The dominant phyla (relative  
142 abundance > 1% across all soil samples) were Proteobacteria, Actinobacteria,  
143 Chloroflexi, Acidobacteria, Nitrospirae, Gemmatimonadetes, Planctomycetes, and  
144 these phyla accounted for 60-91% of the total microbial abundances in the whole soil  
145 profile (SI Appendix, Fig. S1a). Bacteroidetes, Verrucomicrobia, Latescibacteria,  
146 Parcubacteria, Firmicutes, Microgenomates and Saccharibacteria were less dominant  
147 (relative abundance > 0.1% across all soil samples) but were still found across all soil  
148 samples (SI Appendix, Fig. S1a). Although no difference in the composition of

149 dominant phyla among treatments were found, there are more non-dominant phyla  
150 with higher relative abundance in low disturbance practices than conventional tillage  
151 practice (SI Appendix, Fig. S1b).

152 Indicator analysis identified 16 and 51 clearly classified genera (relative  
153 abundances > 0.005%) in the NTNS and the NTSM plots, respectively, while no  
154 indicator genera were found in the conventional tillage plots (Fig. 4 and SI Appendix,  
155 Table S2). The indicator genera in the NTNS plots belonged to Proteobacteria,  
156 Actinobacteria, Chloroflexi, Gemmatimonadetes and Planctomycetes, and most of  
157 them appeared in the surface soil (0-20 cm) with only 1 genus below 150 cm.  
158 Importantly, more extra indicator genera — including Bacteroidetes, Acidobacteria,  
159 Deferribacteres, Firmicutes, Verrucomicrobia, Chlorobi and Spirochaetae — existed  
160 in the NTSM plots, in which under 150 cm we observed 7 genera (Fig. 4 and SI  
161 Appendix, Table S2).

162 Microbial community structures were visualized by Non-metric multidimensional  
163 scaling (MDS) and tested by Permutational multivariate analysis of variance  
164 (PERMANOVA) based on Bray–Curtis. The microbial communities among  
165 treatments in the root zones were marginally different (PERMANOVA  $p=0.08$ );  
166 however, below the root zone they differed distinctively (PERMANOVA  $p=0.02$ ). The  
167 disturbance practices influenced the vertical distribution dissimilarity in microbial  
168 community structure (Fig. 5). Three clusters — 0-10 cm and 10-20 cm, 20-150 cm  
169 and 150-300 cm — were observed in the CT plots (PERMANOVA- $F=9.57$ ,  $p=0.0001$ )  
170 (Fig. 5). In the NTNS plots, 0-10 cm formed an independent cluster, while other soil  
171 depths showed some separation (e.g. 20-120 cm were separated from 150-300 cm soil  
172 depths by axis 1); however, Bray-Curtis distances between adjacent depths were too  
173 close to be separated (PERMANOVA- $F=8.18$ ,  $p=0.0001$ ) (Fig. 5). The NTSM



174 treatment clustered 0-10 cm and 10-20 cm together, 120-150 cm, 150-200 cm,  
175 200-250 cm and 250-300 cm separately, and the other depths show some separations  
176 as well (PERMANOVA-F=11.32, p=0.0001) (Fig. 5).

177 **Predicted Ecological functions of microbial communities.** According to the results  
178 of microbial diversity, composition and structure, the metabolic capabilities of  
179 microbial community in the whole 3-m soil profiles were predicted using Tax4Fun (SI  
180 Appendix, Fig. S2). Results showed that low-disturbance practices significantly  
181 increased the abundance of predicted functions related to carbohydrate metabolism,  
182 nucleotide metabolism, glycan biosynthesis and metabolism, lipid metabolism and  
183 metabolism related to cofactors and vitamins (SI Appendix, Fig. S2a). Moreover, the  
184 relative abundances of genes encoding for assimilatory nitrate reduction in  
185 low-disturbance practices were higher than that in conventional tillage practice (SI  
186 Appendix, Fig. S3). The results suggested that in low disturbance practices, microbial  
187 community prefer to convert the nitrate/nitrite to ammonia. We then further assessed  
188 the impact of stover mulching on functional profiles (SI Appendix, Fig. S2b). The  
189 extended error bar plot shows that the NTNS enriched the abundance of amino acid  
190 metabolism and lipid metabolism, while the NTSM enriched the functions associated  
191 to energy metabolism, carbohydrate metabolism, biosynthesis of secondary  
192 metabolites, glycan biosynthesis and metabolism as well as metabolism of cofactors  
193 and vitamins (SI Appendix, Fig. S2b).

194 **Relationships between microbial communities and soil properties.** Forward  
195 selection in Redundancy analysis (RDA) revealed that soil depth (pseudo-F=48, p=  
196 0.002), SOC (pseudo-F=11.5, p= 0.002), SM (pseudo-F=3.4, p= 0.012), soil pH  
197 (pseudo-F=2.3, p=0.018) and soil  $\text{NH}_4^+\text{-N}$  (pseudo-F=2.7, p= 0.026) significantly  
198 affected the vertical distribution of microbial communities (SI Appendix, Fig. S4).

199 Furthermore, the soil properties that regulated the distribution of soil microbes were  
200 different under different disturbance practices. Under the CT treatment, soil microbial  
201 community was mainly affected by soil  $\text{NH}_4^+\text{-N}$  (pseudo-F=4,  $p= 0.002$ ) and soil  
202  $\text{NO}_3^-\text{-N}$  (pseudo-F=2.3,  $p= 0.012$ ) that mainly came from applied fertilizer (Fig. 6).  
203 The microbial community positively correlated to soil  $\text{NH}_4^+\text{-N}$  in the 0-20 cm soil, to  
204 soil  $\text{NO}_3^-\text{-N}$  negatively within 20-150 cm, while to soil  $\text{NO}_3^-\text{-N}$  positively after 150  
205 cm (Fig. 6). Under the NTNS treatment, soil pH (pseudo-F=3.7,  $p=0.004$ ) constrained  
206 the distribution of the microbial community, in which strong negative correlations  
207 occurred in 0-10 cm soil and a positive correlation in 90-150 cm (Fig. 6). Under the  
208 NTSM treatment, soil TN (pseudo-F=11,  $p=0.002$ ), SM (pseudo-F=2.6,  $p=0.004$ ) and  
209 C/N ratio (pseudo-F=1.8,  $p=0.016$ ) significantly influenced the soil microbial  
210 community separation (Fig. 6). In general, the microbes positively correlated with the  
211 soil TN and C/N ratio in the surface soil layers (0-40 cm) and with SM in the middle  
212 layers (40-150 cm), while they were mainly influenced by depth in the deeper soil  
213 (150-300 cm) (Fig. 6).

## 214 **Discussion**

215 **No-tillage practices promote soil health and corn yield.** No-tillage promotes root  
216 growth into deep soil, up to 150 cm in the NTSM. The root exudates with various  
217 organic acid and dead roots likely contributed to the lower soil pH and higher SEOC  
218 in the NTNS and the NTSM, which in turn increased mineral weathering(5) and  
219 diversified the microbial communities with multi-ecological functions. The increased  
220 fine roots in deeper soil retained more nutrients including nutrients in dead roots and  
221 converting nitrate to more stable ammonium (SI Appendix, Fig. S3) and also provided  
222 labile carbon (Fig. 1b) to remove leaked nitrate through denitrification in deeper soil  
223 (below 1.5 m), as higher relative abundance of the denitrification bacteria

224 (*Pseudomonas* and *Caldithrix*)(25, 26) (Fig. 4 and Table. S2) and denitrification genes  
225 (SI Appendix, Fig. S3) were detected in low disturbance practices — particularly in  
226 no-tillage with stover mulching. However, shallower roots in the CT treatment can't  
227 provide enough labile carbon to remove extra soil  $\text{NO}_3^-$ -N in deep soil, thus causing  
228 nitrite accumulation and leaching into deeper soil layers. The amount of inorganic  
229 nitrogen accumulated in the root zones under NTSM ( $427.34 \text{ kg ha}^{-1}$ ) likely could  
230 provide plenty of nitrogen for corn growth in the coming growing season (Fig. 2),  
231 based on the removed nitrogen in the grain ( $\sim 200 \text{ kg ha}^{-1}$ ). Additionally, in line with  
232 many studies that show stover mulching reduces water evaporation and surface runoff  
233 and increase soil moisture in top soils(11, 27), we found that the soil moisture was  
234 significantly higher in the NTSM than in the CT plots. Therefore, no-tillage with  
235 stover mulching not only restores soil health by increasing the holding capacities for  
236 nutrients and water, thus reducing energy input to farm, but also tended to reduce the  
237 risk of nitrate leaching to groundwater. And more importantly, the healthy soil in turn  
238 raises corn production and promote the crop resistance to drought (Fig. 2). All these  
239 are critical to the development of sustainable agriculture and the associated  
240 ecosystems.

241 **No-tillage with stover mulching promotes microbial diversity, richness, and**  
242 **ecological function contributing to sustainable farming.** Under the CT treatment,  
243 tillage heavily disturbed the topsoil and liberated occluded organic materials.  
244 Microbes tended to rapidly use available nutrients in the plowed layer (e.g.  
245  $\text{NH}_4^+$ -N)(28), thereby causing the reduction of microbial metabolic diversity (SI  
246 Appendix, Fig. S2a). Then, the resistance of the soil to stress or disturbance may also  
247 decrease(29). In deeper soil layers, due to shallower roots,  $\text{NO}_3^-$ -N could quickly  
248 move downward and accumulate in deeper soil (Fig. 1i), which not only contaminated

249 the underground water but also limited the activity of non-dominant microbes with  
250 important ecological functions, as no indicator genera were identified for each soil  
251 depth in CT treatment (Fig. 4 and SI Appendix, Table S2). Because the microbial  
252 communities were closely associated with inorganic nitrogen, the microbes under CT  
253 were mainly influenced by added chemical fertilizer. Although the dominant  
254 microbial communities in CT were similar to those in the NTNS and NTSM, the loss  
255 of function resulted from the difference of non-dominant microbes, indicating that the  
256 soil under CT had degraded.

257 Under the NTNS treatment, soil pH was the major edaphic factor affecting the  
258 microbial community and the indicator genera (Fig. 6 and SI Appendix, Table S2).  
259 The lower soil pH possibly was caused by deeper roots as shown by higher SEOC that  
260 is generally positively related to root density(5). Soil pH is often observed as a major  
261 factor determining the microbial composition and structure in natural ecosystems(30,  
262 31), as microbes often show a narrow tolerance to soil pH. In addition, soil pH  
263 regulates the availability of nutrient and mitigate ion toxicity(30-32). Under NTNS,  
264 soil pH and depth only explained 35% distribution of the microbial community (Fig.  
265 6). We speculated that other edaphic factors (e.g. salinity and iron) directly or  
266 indirectly related to soil pH and SEOC also influenced the changes in the microbial  
267 community.

268 Under NTSM treatment, TN and C/N significantly correlated with soil microbial  
269 community due to the high C/N ratio of stover and roots (Fig. 6). Prior studies have  
270 reported that, following maize stover mulching, more organic N, amino acid N, and  
271 amino sugar N were observed in soil(33, 34), which increased the retention time of  
272 nitrogen, hence meeting the nutrient requirement of corn growth and reducing nitrate  
273 loss to underground water. The increased available nitrogen, labile carbon and water

274 in deep soil under NTSM can increase the resilience and resistance of maize to  
275 disturbances with higher grain production (Fig. 2). Zhang et al.(35) also observed  
276 litter-covered soil showed greater resistance to heating and copper addition due to the  
277 changes in soil properties and microbial community structure. Resistance to  
278 disturbance or stresses is the nature of a healthy soil and is essential for maintaining  
279 ecosystem functions, such as decomposing organic matter (35, 36). Under the NTSM  
280 treatment, the microorganisms associated with the degradation of relatively stable  
281 carbon compounds, such as Planctomycetes and Verrucomicrobia (SI Appendix, Table  
282 S3)(37, 38) as well as the indicator *Cellulomonas* and *Azospirillum* (Fig. 4 and SI  
283 Appendix, Table S2) with the function of cellulose decomposition(39, 40) were  
284 increased. The predicted functional profiles related to energy metabolism (Carbon  
285 fixation pathways in prokaryotes), carbohydrate metabolism (TCA cycle, amino sugar,  
286 nucleotide sugar, galactose, fructose), biosynthesis of secondary metabolites  
287 (Carotenoid and Betalain) and glycan biosynthesis were increased, suggesting a  
288 higher metabolic activity and a change in substrate quality (SI Appendix, Fig. S2). In  
289 addition, stover mulching also increased the ecological filter function of soil depth for  
290 selecting microbial communities as more indicator genera of each soil depths were  
291 identified under NTSM compared to NTNS and CT practices (Fig. 4 and SI Appendix,  
292 Table S2). And these indicators residing at different soil depths might enhance the  
293 anti-disturbance ability of NTSM. For example, denitrification bacteria *Caldithrix* and  
294 *Pseudomonas*(25, 26) were the indicator genera of 150-200 cm and 250-300 cm,  
295 respectively (Fig. 4 and SI Appendix, Table S2), which might explain the low nitrate  
296 in the deep soil in NTSM. *Ignavibacteria* and *Spirochaeta*, the indicator genera of  
297 deep soil, have the ability to grow under the conditions of strictly anaerobic(41) and  
298 severely limited nutrients(42), respectively. Surface indicator genera belonging to

299 Bacteroidetes might have the ability to degrade organic matter that is difficult to  
300 decompose(43).

301 **Implications for climate change.** It was observed that about 179.63, 352.34 and  
302 427.34 kg ha<sup>-1</sup> inorganic N were kept in the root-zone soil in the CT, NTNS and  
303 NTSM, respectively. Generally, corn roots reach their maximum depth at the silking  
304 stage(44), which is also the time when the heaviest rainfall occurs in northeastern  
305 China. We therefore expect that the available N kept in the root zone would be  
306 utilized by crops in the coming growing season, which means that fertilizer N could  
307 be cut to meet crop growth and also prevent reactive N losses. Since the nitrogen use  
308 efficiency (NUE) of maize system under the conventional management is 51% in  
309 northeast China (NUE is defined as the efficiency of fertilizer N transferring to  
310 harvested crop N)(45). Then, we conservatively calculate the required fertilizer N in  
311 the next year based on two assumptions: 1) the NUE of soil available N in root zone is  
312 equal to that NUE of applied fertilizer N, both of them are 50%; 2) the mineralized N  
313 during the coming growing season is neglected. Thus, N supply requirement =  
314 Fertilizer N×NUE + N in root zone ×NUE + Stover-N, where Stover-N for NTSM is  
315 60 kg ha<sup>-1</sup>. We estimated the N requirement for each disturbance practice by  
316 multiplying grain yield by grain N concentration (1.4%)(45) plus multiplying stover  
317 yield by stover N concentration (0.8%)(46). For CT, NTNS and NTSM, the mean  
318 annual corn yields were 10946.74, 12487.81 and 13416.81 kg ha<sup>-1</sup>, and the stover  
319 yields were 966.67, 10083.33 and 10833.33 kg ha<sup>-1</sup>, respectively. Thus, the N  
320 requirements were 230.6, 255.5 and 274.5 kg ha<sup>-1</sup> for CT, NTNS and NTSM,  
321 respectively. Therefore, the theoretically conservative amounts of fertilizer N in the  
322 coming growing season are 281.6, 158.7 and 1.7 kg ha<sup>-1</sup> for CT, NTNS and NTSM,

323 respectively. No fertilizer-N is needed to apply without reducing corn yield in the  
324 NTSM plot. Compared to CT, the NTNS and NTSM could at least save respectively  
325 about 122.9 and 281.6 kg ha<sup>-1</sup> N-fertilizer. For every kilogram of fertilizer-N produced  
326 and used on cropland, up to 87.9 MJ of energy is consumed(47) and 13.5 kg of  
327 CO<sub>2</sub>-equivalent (eq) (CO<sub>2</sub>-eq) is emitted(48). Hence, totally 24,752.6 MJ of energy  
328 consumption could be reduced and 3,801.6 kg CO<sub>2</sub>-eq emission could be cut per  
329 hectare cornland in Northeast China at least by using NTSM tillage practice. If this  
330 could be applied to all maize farmland in China (42,000,000 ha, Source: China  
331 Statistics Yearbook 2018), 1.0 EJ of energy could be saved and 159.7 Mt of CO<sub>2</sub>-eq  
332 could be reduced. Based on the average annual energy consumption for households of  
333 China in 2017 (15 EJ, China Statistics Yearbook 2018) and CO<sub>2</sub> emissions (9,839 Mt,  
334 Global Carbon Atlas), the NTSM practice in corn farming has the potential to save 6.7%  
335 of household energy and to reduce 1.6% of CO<sub>2</sub> emissions each year in China.

336 Taken together, we provide new evidence that low-disturbance practice promotes  
337 deep-soil stability to cope with environmental stress through increasing water and  
338 nutrient holding capacity, microbial richness, microbial diversity and ecological  
339 functions. According to ecological theory(49, 50), microbial community assembly in  
340 the CT treatment was mainly based on deterministic processes and significantly  
341 influenced by environmental stress and fertilizer nitrogen. Stover mulching might  
342 alter these processes through deeper roots affecting the vertical heterogeneity in  
343 resource availability(4). When energy resources are richer in the soil, environmental  
344 stress tend to alleviate(51), and higher biodiversity was caused due to more stochastic  
345 processes introduced in community assembly(52). Moreover, low disturbance practice  
346 also showed the potential to increase the maize yield (Fig. 2), save energy, and  
347 decrease the risk of groundwater leaching and greenhouse gas emissions. In view of

348 the importance of microbial community assembly in predicting ecosystem service  
349 functions(53, 54), our results demonstrated that the lowest disturbance-practice —  
350 no-tillage with stover mulching increases the sustainability of agro-ecosystems.



351 **Materials and methods**

352 **Site description and soil sampling.** The field experiment was established in 2007 at  
353 the Lishu Conservation Tillage Research and Development Station of the Chinese  
354 Academy of Sciences in Jilin province, Northeast China (43.19° N, 124.14° E). The  
355 region has a humid continental climate with a mean annual temperature of 6.9 °C and  
356 the mean annual precipitation of 614 mm. The soils are classified in the Mollisol  
357 order (Black Soil in Chinese Soil Classification) with a clay loam texture(55). The site  
358 has been continuously planted with maize since 2007. We set up an experiment by a  
359 randomized complete block design with four replicates and five treatments. Each plot  
360 area was 261m<sup>2</sup> (8.7×30m). The five treatments included conventional tillage  
361 (moldboard plowing to a depth around 30 cm), no-tillage (no soil disturbance and  
362 direct seeding), and no-tillage with three-level stover mulching (33%, 67% and 100%  
363 newly produced maize stover were evenly spread over the soil surface each fall). For  
364 each treatment, slow-release fertilizer was applied at one time when sowing, which  
365 was equal to 240 kg/ha N; 47 kg/ha P; 90 kg/ha K. The rainfall data were obtained  
366 from local meteorological administration. The grain yield was estimated by manually  
367 harvesting 20 m<sup>2</sup> area, randomly taken from each plot.

368 In this experiment, in order to reduce the damage to the plots and reduce costs, 3  
369 plots were randomly taken from each treatment including conventional tillage (CT),  
370 no-tillage without stover mulching (NTNS), no-tillage with 100% stover coverage  
371 (NTSM) as three comparative practices. In April 2017, triplicate soil cores (0-300 cm)  
372 were collected from each plot at the dormant season. After removing surface stover,  
373 we took soil cores by a stainless-steel hand auger and sliced each into ten layers: 0-10  
374 cm, 10-20 cm, 20-40 cm, 40-60 cm, 60-90 cm, 90-120 cm, 120-150 cm, 150-200 cm,  
375 200-250 cm, 250-300 cm. In total, 90 soil samples were collected and transported to

376 the laboratory within 3 hours, then passed through a 2-mm sieve. All visible roots,  
377 crop residues and stones were removed. Each soil sample was divided into three  
378 subsamples: one subsample for DNA extraction and soil salt-extractable organic  
379 carbon (SEOC) measurement that was immediately placed into a polyethylene plastic  
380 bag and stored at -80 °C, one for chemical measurements including ammonium  
381 nitrogen ( $\text{NH}_4^+$ -N) and nitrate nitrogen ( $\text{NO}_3^-$ -N) (within one day), and the remaining  
382 one was air dried for other soil physicochemical properties.

383 **Soil properties.** Soil total nitrogen (TN) content was measured by an Element  
384 analyzer Vario EL III (Elementar Analysensysteme GmbH, Hanau, Germany). Soil  
385 organic carbon (SOC) was converted from soil organic matter (SOM) that was  
386 measured by potassium dichromate oxidation(56). Soil pH was measured in deionized  
387 free- $\text{CO}_2$  water (1:2.5 w/v). Gravimetric soil moisture was determined by oven-drying  
388 fresh soil to a constant weight at 105 °C. Soil  $\text{NH}_4^+$ -N and  $\text{NO}_3^-$ -N were extracted  
389 from fresh soil by 2 M KCl and measured by a continuous flow analytical system  
390 (AA3, SEAI, Germany). To reflect soil soluble, exchangeable, mineral-bound OC,  
391 soil salt-extractable organic carbon (SEOC) was extracted from the frozen soil  
392 samples with 0.5 M  $\text{K}_2\text{SO}_4$  (1:5 w/v)(4, 57, 58).

393 **DNA extraction, PCR amplification and pyrosequencing.** Soil DNA was extracted  
394 from the frozen soil samples (0.5 g wet weight) by using MoBio PowerSoil DNA  
395 isolation kit (MoBio Laboratories, Carlsbad, CA, USA) following the instructions of  
396 the manufacturer. The quality of DNA was determined by 1% agarose gel  
397 electrophoresis. The V3–V4 region of the bacterial 16S rRNA gene was amplified by  
398 PCR using the primers 338F and 806R with barcode for Illumina MiSeq sequencing.  
399 PCR was performed in a total volume of 50  $\mu\text{l}$  containing 30 ng DNA as a template,  
400 20 mol of each primer, 10mM dNTPs, 5 $\mu\text{l}$  10 $\times$  Pyrobest buffer and 0.3 U of Pyrobest

401 polymerase (Takara Code: DR005A). The PCR cycle conditions were as follows:  
402 initial denaturation at 95°C for 5 min followed by 26 cycles of denaturation at 95°C  
403 for 45s, annealing at 50°C for the 30s, and extension at 72°C for 45s, with a final  
404 extension at 72°C for 10 min. Each sample was amplified for three replicates. The  
405 PCR products from the same sample were pooled, checked by 2% agarose gel  
406 electrophoresis and were then purified using AxyPrepDNA agarose purification kit  
407 (AXYGEN). Finally, purified PCR products were sequenced on an Illumina MiSeq  
408 platform PE300 sequencer (Illumina, USA).

409 The raw sequence data were further analyzed by the following protocol.  
410 Low-quality sequences with an average quality score of less than 20 were filtered by  
411 employing Trimmomatic(59). The FLASH software was used to merge overlapping  
412 ends and treat them as single-end reads(60). The non-amplified region sequences,  
413 chimeras and shorter tags were also removed using Usearch and Mothur(61, 62). The  
414 resulting high-quality sequences were clustered into Operational Taxonomic Units  
415 (OTUs) at 97% sequence similarity using Usearch (Version 8.1.1861  
416 <http://www.drive5.com/usearch/>) (Edgar, 2013). OTUs were then classified against  
417 the Silva (Release119 <http://www.arb-silva.de>) database and the taxonomic  
418 information of each OTU representative sequence was annotated using the RDP  
419 Classifier(63-65). A total of 3,255,693 high-quality reads were obtained from all soil  
420 samples, which were clustered into 9,573 unique OTUs at a 97% sequence similarity.  
421 The Good's coverage of all the samples ranged from 0.93 to 0.98, which indicates an  
422 adequate level of sequencing to identify the majority of diversity in the samples.

423 **Statistical analyses.** Soil properties were analyzed and plotted using Sigmaplot 12.5  
424 software. Alpha diversity indices were calculated in Qiime (version v.1.8) and used to  
425 reflect the diversity and richness of the microbial community in different samples.

426 The relative abundances of individual phyla in different samples were computed by R  
427 packages. The indicator analysis based on genera-specific to each soil depth was  
428 conducted using indicpecies package of R with 9999 permutations, and the P-values  
429 were corrected for multiple testing using qvalue package of R(14, 66). Functional  
430 profiles of the microbial community were predicted by Tax4fun (an open-source  
431 package in R)(67) and further statistical analysis was conducted by STAMP using  
432 Welch's t-test(68). Non-metric multidimensional scaling (MDS) was performed by  
433 "vegan" package of R to describe differences in microbial community structure  
434 among samples. Permutational multivariate analysis of variance (PERMANOVA) was  
435 employed on Bray-Curtis distances to test the differences in soil microbial  
436 communities among various sample groups. The Redundancy analysis (RDA, Canoco  
437 5 software) were conducted to identify the correlations between microbial community  
438 composition and environmental variables. One-way and two-way ANOVA tests were  
439 conducted by SPSS Version 22. Percentage data were transformed using arcsine  
440 square root function before ANOVA test. All statistical tests were significant at  $p \leq$   
441 0.05.

#### 442 **Acknowledgments**

443 We would like to thank Dr. William H. Schlesinger at the Cary Institute of Ecosystem  
444 Studies for his comments and Dr. Randy Neighbarger at Duke University for language  
445 editing. This work was supported by the "National Key R&D Program" (No.  
446 2016YFD0800103, 2016YFD0200307) and the National Natural Science Foundation  
447 of China (grant number, 41671297). We would like to thank Pengshuai Shao,  
448 Xuesong Ma and many individuals for assistance with sample collection, processing  
449 and analysis.

450 **Data availability.** All sequencing data that support the findings of this study have  
451 been deposited in the National Center for Biotechnology Information  
452 (<https://www.ncbi.nlm.nih.gov/>), in the Sequence Read Archive (SRA) database  
453 (BioProject number: PRJNA488172). All other relevant data are available from the  
454 corresponding author on request.

455 **Supporting information**

456 This article contains supporting information online at .....

457 **Competing interests**

458 The authors declare no competing interests.

459

460

461

462 **References**

- 463 1. J. Sanderman, T. Hengl, G. J. Fiske, Soil carbon debt of 12,000 years of human land  
464 use. *Proc. Natl. Acad. Sci. U.S.A.* **114**, 9575-9580 (2017).
- 465 2. K. Congreves, A. Hayes, E. Verhallen, L. Van Eerd, Long-term impact of tillage and  
466 crop rotation on soil health at four temperate agroecosystems. *Soil Tillage Res.* **152**,  
467 17-28 (2015).
- 468 3. P. M. Vitousek *et al.*, Nutrient imbalances in agricultural development. *Science* **324**,  
469 1519-1520 (2009).
- 470 4. W. D. Kemper, N. N. Schneider, T. R. Sinclair, No-till can increase earthworm  
471 populations and rooting depths. *J. Soil Water Conserv.* **66**, 13A-17A (2011).
- 472 5. S. A. Billings *et al.*, Loss of deep roots limits biogenic agents of soil development that  
473 are only partially restored by decades of forest regeneration. *Elem Sci Anth* **6**, 34  
474 (2018).
- 475 6. M. A. Salem, Economics of reduced tillage technology on soil conservation and risk  
476 analysis for Eastern Oklahoma farmers. (*Oklahoma State University, 1983*).
- 477 7. H. Blanco-Canqui, R. Lal, No-tillage and soil-profile carbon sequestration: An on-farm  
478 assessment. *Soil Sci. Soc. Am. J.* **72**, 693-701 (2008).
- 479 8. C. Liu, M. Lu, J. Cui, B. Li, C. Fang, Effects of straw carbon input on carbon dynamics  
480 in agricultural soils: a meta-analysis. *Glob. Chang. Biol.* **20**, 1366-1381 (2014).
- 481 9. F. E. I. Lu *et al.*, Soil carbon sequestrations by nitrogen fertilizer application, straw  
482 return and no-tillage in China's cropland. *Glob. Chang. Biol.* **15**, 281-305 (2009).
- 483 10. K. Song *et al.*, Effects of tillage and straw return on water-stable aggregates, carbon

- 484 stabilization and crop yield in an estuarine alluvial soil. *Sci. Rep.* **9**, 4586 (2019).
- 485 11. M. Prosdocimi *et al.*, The immediate effectiveness of barley straw mulch in reducing  
486 soil erodibility and surface runoff generation in Mediterranean vineyards. *Sci. Total*  
487 *Environ.* **547**, 323-330 (2016).
- 488 12. C. Liang, J. P. Schimel, J. D. Jastrow, The importance of anabolism in microbial  
489 control over soil carbon storage. *Nat. Microbiol.* **2**, 17105 (2017).
- 490 13. J. Schimel, S. M. Schaeffer, Microbial control over carbon cycling in soil. *Front.*  
491 *Microbiol.* **3**, 348 (2012).
- 492 14. B. Zhang *et al.*, Soil depth and crop determinants of bacterial communities under ten  
493 biofuel cropping systems. *Soil Biol. Biochem.* **112**, 140-152 (2017).
- 494 15. C. J. Nevins, C. Nakatsu, S. Armstrong, Characterization of microbial community  
495 response to cover crop residue decomposition. *Soil Biol. Biochem.* **127**, 39-49 (2018).
- 496 16. R. Schmidt, K. Gravuer, A. V. Bossange, J. Mitchell, K. Scow, Long-term use of cover  
497 crops and no-till shift soil microbial community life strategies in agricultural soil. *PloS*  
498 *ONE* **13**, e0192953 (2018).
- 499 17. K. G. Eilers, S. Debenport, S. Anderson, N. Fierer, Digging deeper to find unique  
500 microbial communities: the strong effect of depth on the structure of bacterial and  
501 archaeal communities in soil. *Soil Biol. Biochem.* **50**, 58-65 (2012).
- 502 18. M. Sagova-Mareckova *et al.*, The structure of bacterial communities along two vertical  
503 profiles of a deep colluvial soil. *Soil Biol. Biochem.* **101**, 65-73 (2016).
- 504 19. C. E. H. Pries, C. Castanha, R. Porras, M. Torn, The whole-soil carbon flux in  
505 response to warming. *Science* **355**, 1420-1423 (2017).

- 506 20. J. Chorover, R. Kretschmar, F. Garcia-Pichel, D. L. Sparks, Soil biogeochemical  
507 processes within the critical zone. *Elements* **3**, 321-326 (2007).
- 508 21. D. d. B. Richter, D. H. Yaalon, " The Changing Model of Soil" revisited. *Soil Sci. Soc.*  
509 *Am. J.* **76**, 766-778 (2012).
- 510 22. X. Liu *et al.*, Soil degradation: a problem threatening the sustainable development of  
511 agriculture in Northeast China. *Plant Soil Environ.* **56**, 87-97 (2010).
- 512 23. Z. Liu, X. Yang, K. G. Hubbard, X. Lin, Maize potential yields and yield gaps in the  
513 changing climate of northeast China. *Glob. Chang. Biol.* **18**, 3441-3454 (2012).
- 514 24. J. Canadell *et al.*, Maximum rooting depth of vegetation types at the global scale.  
515 *Oecologia* **108**, 583-595 (1996).
- 516 25. I. Koike, A. Hattori, Growth yield of a denitrifying bacterium, *Pseudomonas*  
517 *denitrificans*, under aerobic and denitrifying conditions. *Microbiology* **88**, 1-10 (1975).
- 518 26. M. L. Miroshnichenko *et al.*, *Caldithrix abyssii* gen. nov., sp. nov., a nitrate-reducing,  
519 thermophilic, anaerobic bacterium isolated from a Mid-Atlantic Ridge hydrothermal  
520 vent, represents a novel bacterial lineage. *Int. J. Syst. Evol. Microbiol.* **53**, 323-329  
521 (2003).
- 522 27. P. De Vita, E. Di Paolo, G. Fecondo, N. Di Fonzo, M. Pisante, No-tillage and  
523 conventional tillage effects on durum wheat yield, grain quality and soil moisture  
524 content in southern Italy. *Soil Tillage Res.* **92**, 69-78 (2007).
- 525 28. D. A. Ramirez-Villanueva *et al.*, Bacterial community structure in maize residue  
526 amended soil with contrasting management practices. *Appl. Soil Ecol.* **90**, 49-59  
527 (2015).



- 528 29. C. Kremen, Managing ecosystem services: what do we need to know about their  
529 ecology? *Ecol. Lett.* **8**, 468-479 (2005).
- 530 30. K. Zhalnina *et al.*, Soil pH determines microbial diversity and composition in the park  
531 grass experiment. *Microb. Ecol.* **69**, 395-406 (2015).
- 532 31. C. L. Lauber, M. Hamady, R. Knight, N. Fierer, Pyrosequencing-based assessment of  
533 soil pH as a predictor of soil bacterial community structure at the continental scale.  
534 *Appl. Environ. Microbiol.* **75**, 5111-5120 (2009).
- 535 32. J. Rousk *et al.*, Soil bacterial and fungal communities across a pH gradient in an  
536 arable soil. *ISME J.* **4**, 1340 (2010).
- 537 33. C. Lu *et al.*, Effects of N fertilization and maize straw on the dynamics of soil organic N  
538 and amino acid N derived from fertilizer N as indicated by <sup>15</sup>N labeling. *Geoderma*  
539 **321**, 118-126 (2018).
- 540 34. X. Liu *et al.*, Linking microbial immobilization of fertilizer nitrogen to in situ turnover of  
541 soil microbial residues in an agro-ecosystem. *Agric., Ecosyst. Environ.* **229**, 40-47  
542 (2016).
- 543 35. B. Zhang, H. Wang, S. Yao, L. Bi, Litter quantity confers soil functional resilience  
544 through mediating soil biophysical habitat and microbial community structure on an  
545 eroded bare land restored with mono *Pinus massoniana*. *Soil Biol. Biochem.* **57**,  
546 556-567 (2013).
- 547 36. M. Kibblewhite, K. Ritz, M. Swift, Soil health in agricultural systems. *Philos Trans R*  
548 *Soc Lond B Biol Sci* **363**, 685-701 (2008).
- 549 37. O. Erbilgin, K. L. McDonald, C. A. Kerfeld, Characterization of a planctomycetal

- 550 organelle: a novel bacterial microcompartment for the aerobic degradation of plant  
551 saccharides. *Appl. Environ. Microbiol.* **80**, 2193-2205 (2014).
- 552 38. D. P. Herlemann *et al.*, Metagenomic de novo assembly of an aquatic representative  
553 of the verrucomicrobial class Spartobacteria. *MBio* **4**, e00569-00512 (2013).
- 554 39. D. M. Halsall, D. J. Goodchild, Nitrogen fixation associated with development and  
555 localization of mixed populations of *Cellulomonas* sp. and *Azospirillum brasilense*  
556 grown on cellulose or wheat straw. *Appl. Environ. Microbiol.* **51**, 849-854 (1986).
- 557 40. J. Pathma, G. Raman, N. Sakthivel, Microbiome of Rhizospheric Soil and  
558 Vermicompost and Their Applications in Soil Fertility, Pest and Pathogen  
559 Management for Sustainable Agriculture. 189-210 (*Springer, Singapore, 2019*).
- 560 41. T. Iino *et al.*, *Ignavibacterium album* gen. nov., sp. nov., a moderately thermophilic  
561 anaerobic bacterium isolated from microbial mats at a terrestrial hot spring and  
562 proposal of *Ignavibacteria* classis nov., for a novel lineage at the periphery of green  
563 sulfur bacteria. *Int. J. Syst. Evol. Microbiol.* **60**, 1376-1382 (2010).
- 564 42. J. Terracciano, E. Canale-Parola, Enhancement of chemotaxis in *Spirochaeta*  
565 *aurantia* grown under conditions of nutrient limitation. *J. Bacteriol.* **159**, 173-178  
566 (1984).
- 567 43. F. Thomas, J.-H. Hehemann, E. Rebuffet, M. Czjzek, G. Michel, Environmental and  
568 gut bacteroidetes: the food connection. *Front. Microbiol.* **2**, 93 (2011).
- 569 44. S. Archontoulis, M. A. Licht, How Fast and Deep do Corn Roots Grow in Iowa?  
570 *Integrated Crop Management News*, 2442 (2017).
- 571 45. C. Zhang, X. Ju, D. S. Powlson, O. Oenema, P. Smith, Nitrogen surplus benchmarks

- 572 for controlling N pollution in the main cropping systems of China. *Environ. Sci. Technol.*  
573 **53**, 6678-6687 (2019).
- 574 46. A. Iżewska, C. Wołoszyk, Yields of grain and straw, their content and ionic proportions  
575 of macroelements in maize fertilized with ash from municipal sewage sludge  
576 combustion. *J Elementology* **20**, 319-329 (2015).
- 577 47. S. Kennedy, Energy use in American agriculture. *Sustainable energy term paper* **5**,  
578 1-26 (2000).
- 579 48. W.-f. Zhang *et al.*, New technologies reduce greenhouse gas emissions from  
580 nitrogenous fertilizer in China. *Proc. Natl. Acad. Sci. U.S.A.* **110**, 8375-8380 (2013).
- 581 49. D. Goss-Souza *et al.*, Soil microbial community dynamics and assembly under  
582 long-term land use change. *FEMS Microbiol. Ecol.* **93**, fix109 (2017).
- 583 50. J. C. Stegen, X. Lin, A. E. Konopka, J. K. Fredrickson, Stochastic and deterministic  
584 assembly processes in subsurface microbial communities. *ISME J.* **6**, 1653 (2012).
- 585 51. Y. Feng *et al.*, Balanced fertilization decreases environmental filtering on soil bacterial  
586 community assemblage in north China. *Front. Microbiol.* **8**, 2376 (2017).
- 587 52. J. M. Chase, Stochastic community assembly causes higher biodiversity in more  
588 productive environments. *Science* **328**, 1388-1391 (2010).
- 589 53. S. Ferrenberg *et al.*, Changes in assembly processes in soil bacterial communities  
590 following a wildfire disturbance. *ISME J.* **7**, 1102 (2013).
- 591 54. F. García-Orenes, A. Morugán-Coronado, R. Zornoza, K. Scow, Changes in soil  
592 microbial community structure influenced by agricultural management practices in a  
593 Mediterranean agro-ecosystem. *PLoS ONE* **8**, e80522 (2013).

- 594 55. W. IUSS Working Group, World reference base for soil resources. *World Soil*  
595 *Resources Report 103*, FAO, Rome (2006).
- 596 56. D. Nelson, L. E. Sommers, "Total carbon, organic carbon, and organic matter." in  
597 *Methods of soil analysis, Part 2* (2nd). , A. Page, R. Miller, D. Keeney, Eds. (American  
598 Society of Agronomy and Soil Science Society of America, Madison, WI, 1982), pp.  
599 539-579.
- 600 57. J. Canadell *et al.*, Maximum rooting depth of vegetation types at the global scale.  
601 *Oecologia 108*, 583-595 (1996).
- 602 58. J. Rousk, E. Baath, Fungal and bacterial growth in soil with plant materials of different  
603 C/N ratios. *FEMS Microbiol. Ecol.* **62**, 258-267 (2007).
- 604 59. A. M. Bolger, M. Lohse, B. Usadel, Trimmomatic: a flexible trimmer for Illumina  
605 sequence data. *Bioinformatics 30*, 2114-2120 (2014).
- 606 60. H. Derakhshani, H. M. Tun, E. Khafipour, An extended single-index multiplexed 16S  
607 rRNA sequencing for microbial community analysis on MiSeq illumina platforms. *J.*  
608 *Basic Microbiol.* **56**, 321-326 (2016).
- 609 61. M. Mysara, N. Leys, J. Raes, P. Monsieurs, IPED: a highly efficient denoising tool for  
610 Illumina MiSeq Paired-end 16S rRNA gene amplicon sequencing data. *BMC*  
611 *bioinformatics 17*, 192 (2016).
- 612 62. J. J. Kozich, S. L. Westcott, N. T. Baxter, S. K. Highlander, P. D. Schloss,  
613 Development of a dual-index sequencing strategy and curation pipeline for analyzing  
614 amplicon sequence data on the MiSeq Illumina sequencing platform. *Appl. Environ.*  
615 *Microbiol.* **79**, 5112-5120 (2013).

- 616 63. C. Quast *et al.*, The SILVA ribosomal RNA gene database project: improved data  
617 processing and web-based tools. *Nucleic acids research* **41**, D590-D596 (2012).
- 618 64. Q. Wang, G. M. Garrity, J. M. Tiedje, J. R. Cole, Naive Bayesian classifier for rapid  
619 assignment of rRNA sequences into the new bacterial taxonomy. *Appl. Environ.*  
620 *Microbiol.* **73**, 5261-5267 (2007).
- 621 65. J. J. Werner *et al.*, Impact of training sets on classification of high-throughput bacterial  
622 16s rRNA gene surveys. *ISME J.* **6**, 94 (2012).
- 623 66. N. Jiménez-Bueno *et al.*, Bacterial indicator taxa in soils under different long-term  
624 agricultural management. *J. Appl. Microbiol.* **120**, 921-933 (2016).
- 625 67. K. P. Aßhauer, B. Wemheuer, R. Daniel, P. Meinicke, Tax4Fun: predicting functional  
626 profiles from metagenomic 16S rRNA data. *Bioinformatics* **31**, 2882-2884 (2015).
- 627 68. D. H. Parks, G. W. Tyson, P. Hugenholtz, R. G. Beiko, STAMP: statistical analysis of  
628 taxonomic and functional profiles. *Bioinformatics* **30**, 3123-3124 (2014).
- 629
- 630
- 631
- 632

633 **Figure Legends**

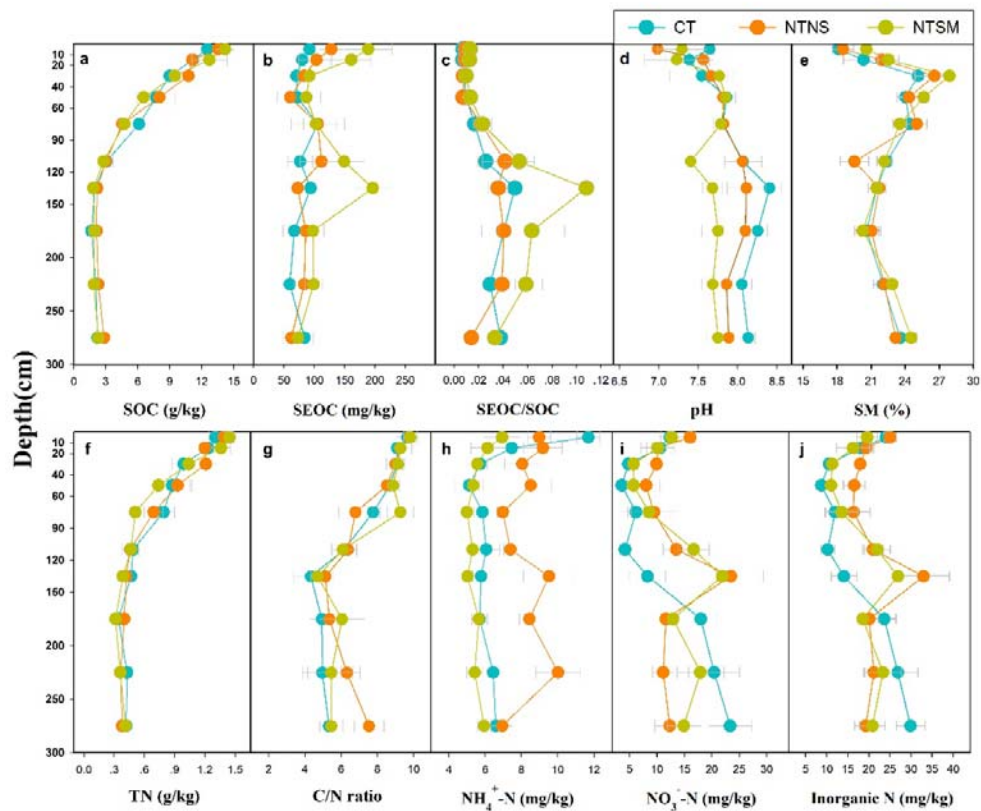

634

635 **Figure 1.** Soil properties (mean±SE, n = 3) along soil depth under different practices.

636 SOC = soil organic carbon, SEOC = salt-extractable organic carbon, SEOC/SOC =

637 ratio of SEOC to SOC, SM = soil moisture, TN = total nitrogen content, C/N = ratio

638 of SOC to TN,  $\text{NH}_4^+\text{-N}$  = ammonium nitrogen,  $\text{NO}_3^-\text{-N}$  = nitrate nitrogen, Inorganic N

639 =  $\text{NH}_4^+\text{-N}$  +  $\text{NO}_3^-\text{-N}$ .

640

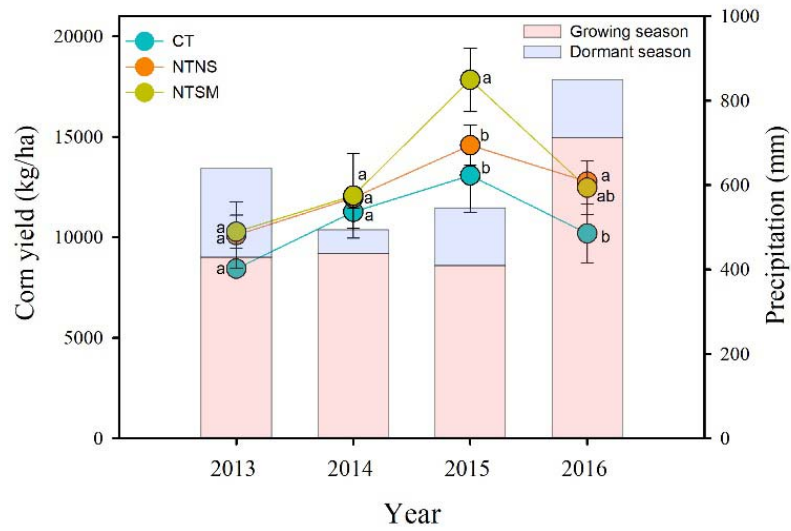

641

642 **Figure 2.** Corn yield (line+symbol) and annual rainfall during growing and dormant  
643 seasons (bar) under different disturbance practices during 2013-2016. Error bars  
644 indicate standard errors (n = 3 or 4), different letters indicate significant differences at  
645 P < 0.05.

646

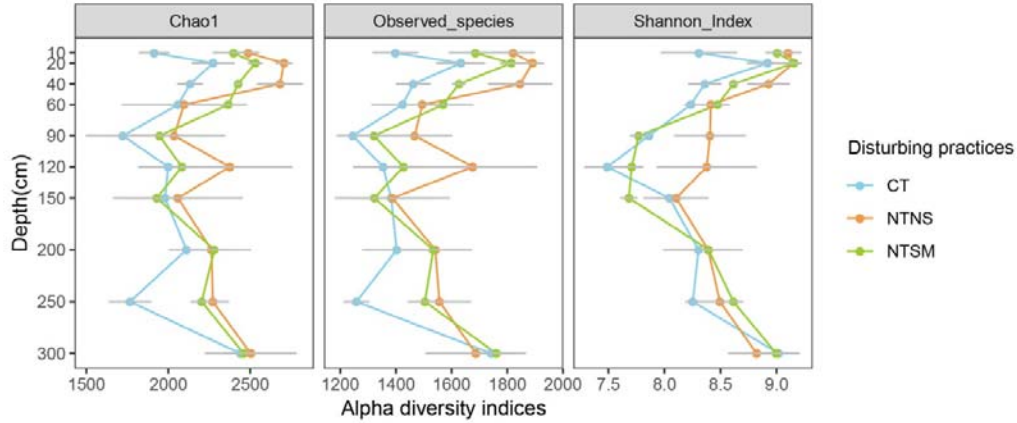

647

648 **Figure 3.** Microbial richness (Chao1), observed number of species (Observed\_species)

649 and diversity (Shannon\_Index) in the CT (conventional tillage), NTNS (no-tillage

650 without stover mulching) and NTSM (no-tillage with stover mulching) plots. Error

651 bars indicate standard deviation (n = 3).

652



### NTNS Treatment

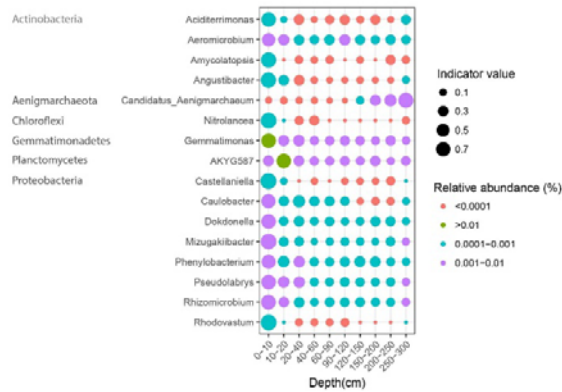

### NTSM Treatment

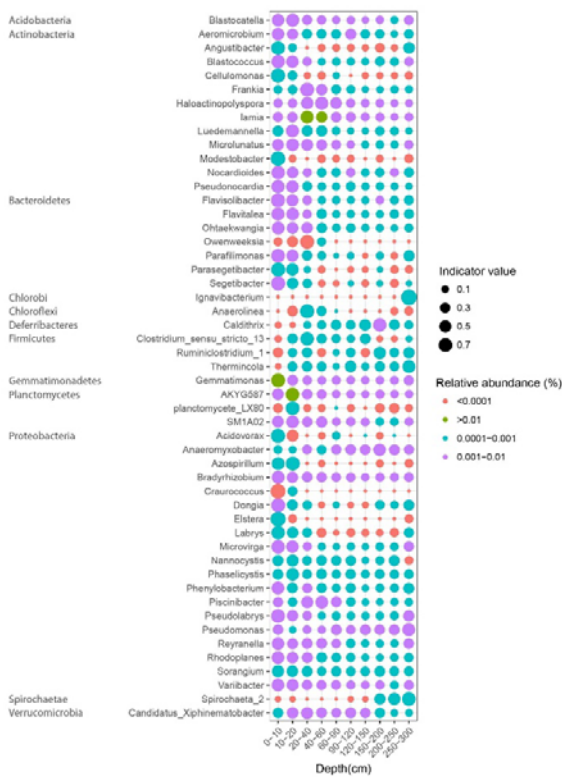

653

654 **Figure 4.** Indicator genera significantly ( $q < 0.1$ ) associated with tillage practices. The  
 655 size of each circle represents the indicator value of a specific genus in the different  
 656 soil depths. The color indicates the relative abundance of each indicator genus.  
 657 Taxonomic information, indicator values, P-values, and q-values of all indicator  
 658 genera are given in SI Appendix, Table S2. Zero indicator genera were identified in  
 659 CT treatment.

660

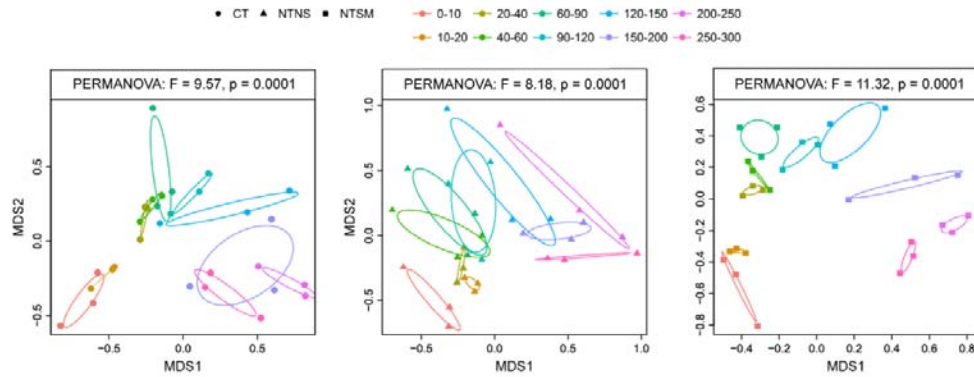

661

662 **Figure 5.** Non-metric multidimensional scaling (MDS) ordination of soil microbial  
663 community structures based on Bray-Curtis distances among soil depths at different  
664 agricultural disturbance practices. Permutational multivariate analysis of variance  
665 (PERMANOVA) revealed that the overall microbial community structures among soil  
666 depth were significantly different at each disturbance practice. Circles, triangles and  
667 squares represent CT (conventional tillage), NTNS (no-tillage without stover  
668 mulching) and NTSM (no-tillage with stover mulching), respectively.

669

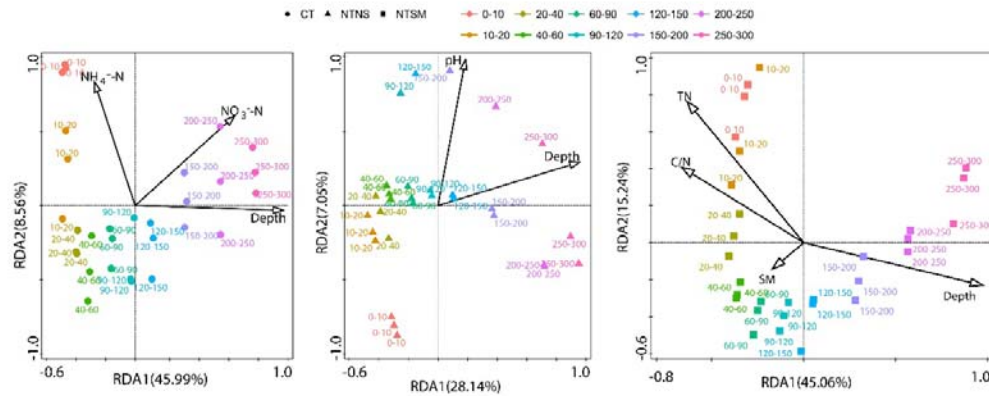

670

671 **Figure 6.** Redundancy analysis (RDA) of the soil microbial community originating

672 from microbial phyla constrained by soil properties under different agricultural

673 practices. Only soil variables that significantly explained variability in microbial

674 community structure in the forward selection procedure were selected to the

675 ordination (arrows). TN, total nitrogen content; C/N, a ratio of carbon to nitrogen

676 content;  $\text{NH}_4^+\text{-N}$ , ammonium nitrogen;  $\text{NO}_3^-\text{-N}$ , nitrate nitrogen ; SM, soil moisture.

677 Circles, triangles and squares represent CT (conventional tillage), NTNS (no-tillage

678 without stover mulching) and NTSM (no-tillage with stover mulching), respectively.

679

680 **Low-disturbance farming regenerates healthy critical zone**

681 **towards sustainable agriculture**

682 **Supplementary Information**

683 **Supplementary Figures**

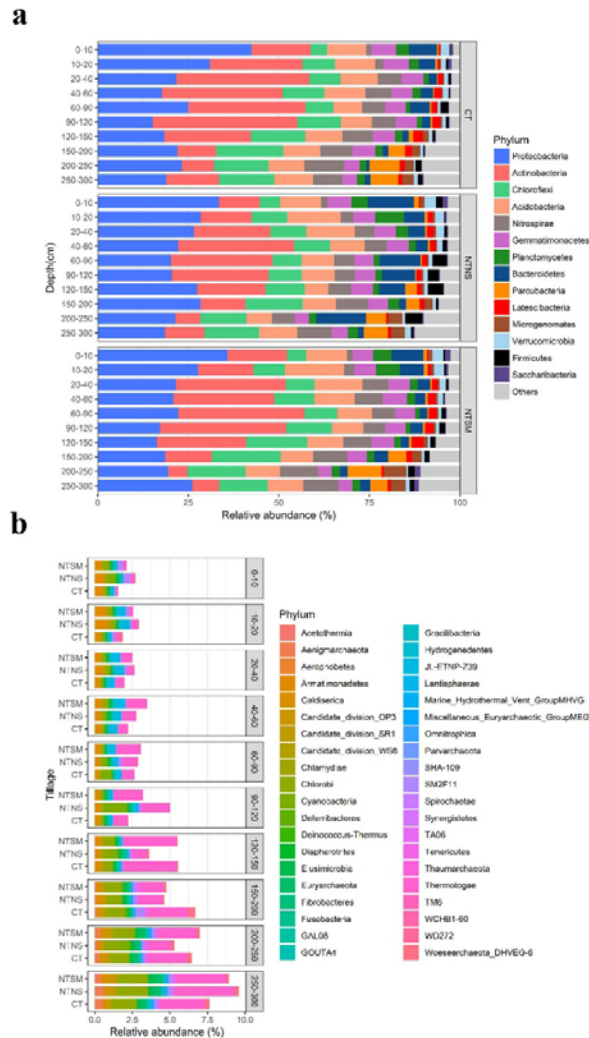

684  
 685 **Figure S1.** The relative abundance of bacterial community composition at the phylum  
 686 level. **a** Only the bacterial phyla with the relative abundance > 0.1% across all soil  
 687 samples were shown. **b** “Others” in the (a) panel represents the sum of bacterial phyla  
 688 that individual relative abundance < 0.1% across all soil samples were shown.  
 689 Abbreviations: CT (conventional tillage), NTNS (no-tillage without stover mulching)  
 690 and NTSM (no-tillage with stover mulching).

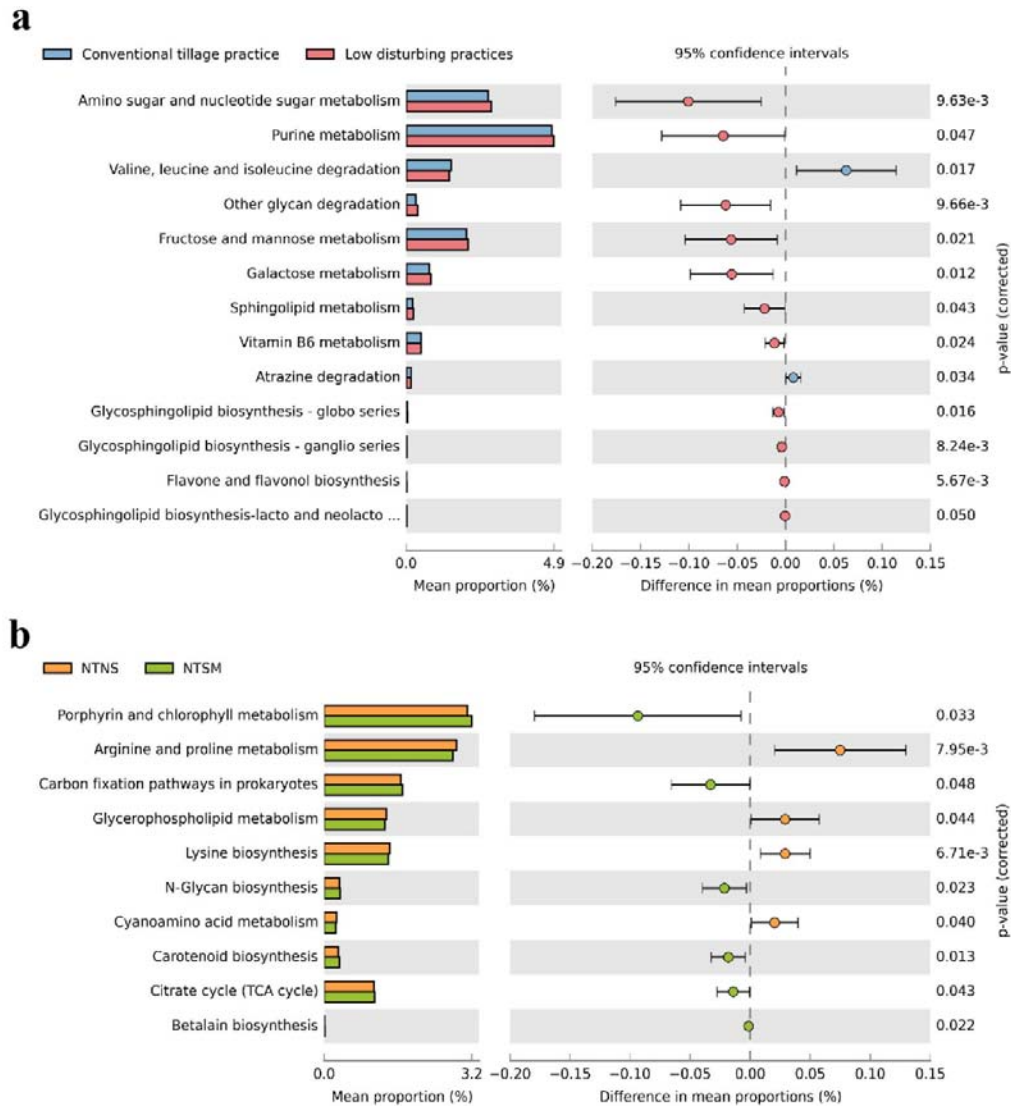

691

692 **Figure S2.** Extended error bar plots showing significant differences of 16S rRNA

693 gene-predicted functional profiles obtained with Tax4Fun. **a** difference between mean

694 proportions of conventional practice and low disturbance practices; **b** differences

695 between mean proportions of NTNS (no-tillage without stover mulching) and NTSM

696 (no-tillage with 100% stover mulching).

## Denitrification

### Dissimilatory nitrate reduction

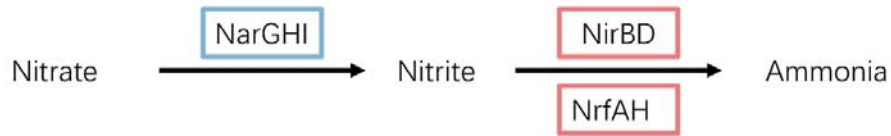

### Assimilatory nitrate reduction

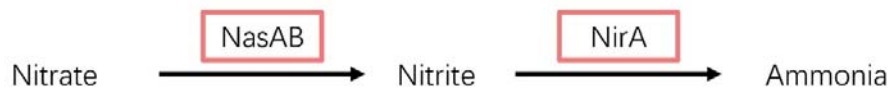

## Nitrification

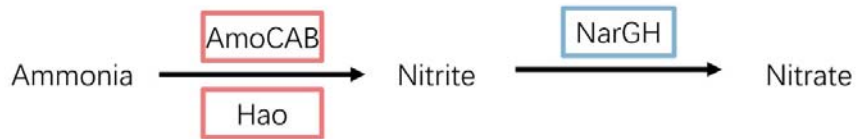

■ Conventional tillage practice    ■ Low disturbing practices

697

698 **Figure S3.** The denitrification and nitrification genes that influenced by different  
699 tillage practices. Genes in red rectangles means higher abundance in low disturbing  
700 practices; Genes in blue rectangles means higher abundance in conventional tillage  
701 practice.

702

703

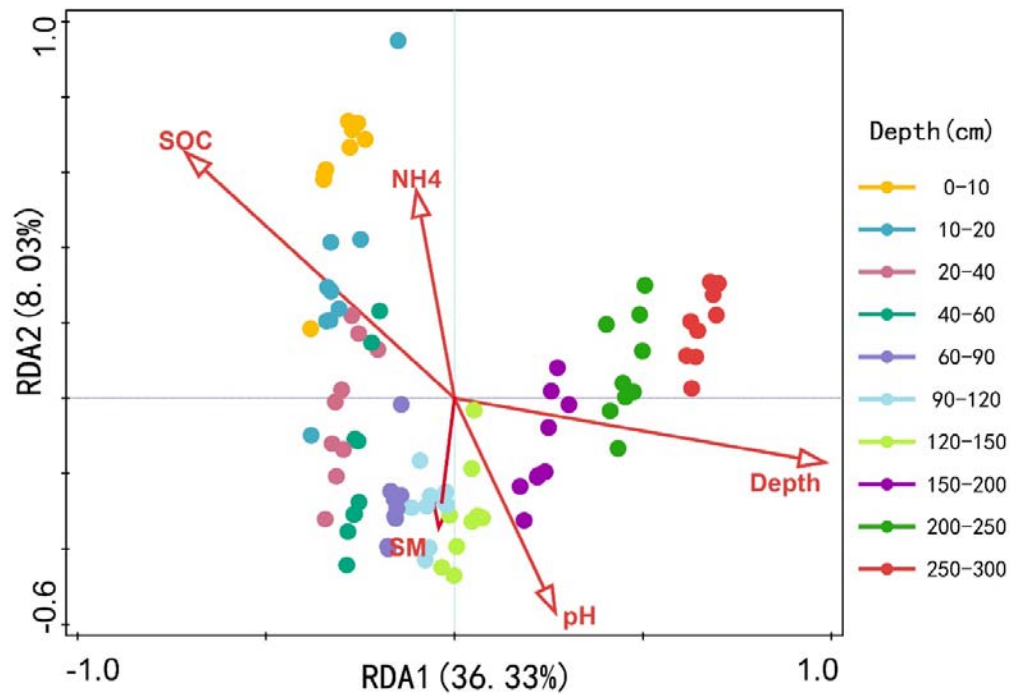

704

705

706 **Figure S4.** Redundancy analysis (RDA) of soil microbial community originating  
707 from microbial phyla constrained by soil properties among soil depths. Only soil  
708 variables that significantly explained variability in microbial community structure in  
709 the forward selection procedure were selected to the ordination (arrows).  
710 Abbreviations: SOC, soil organic carbon; NH<sub>4</sub>, ammonium nitrogen; SM, soil  
711 moisture.

712
